# Supplementary material for: Inactivation of PBX3 and HOXA9 by down-regulating H3K79 methylation represses NPM1-mutated leukemic cell survival
Source: PubMed Central journal article supplement — Theranostics. 2018 Jul 30;8(16):4359–71. doi: 10.7150/thno.26900 (PMC6134928; doi:10.7150/thno.26900), 2018-07-30
Supplement: thnov08p4359s1.pdf [file thnov08p4359s1.pdf]

## Supplementary materials

### **Inactivation of PBX3 and HOXA9 by down-regulating H3K79 methylation represses NPM1-mutated leukemic cell survival**

Wu Zhang, Chen Zhao, Junmei Zhao, Yongmei Zhu, Xiangqin Weng, Qiusheng Chen, Huiping Sun, Jian-Qing Mi, Junmin Li, Jiang Zhu, Zhu Chen, Pier Paolo Pandolfi, Saijuan Chen, Xiaojing Yan, Jie Xu

**Figure S1.** NPMc<sup>+</sup> AML patients have high PBX3 and HOXA9 expression.

**Figure S2.** NPMc<sup>+</sup> drives myeloproliferation in murine hematopoietic progenitors and aberrant H3K79 modification in hematopoietic cells.

**Figure S3.** H3K79me<sub>2</sub>, HOXA9 and PBX3 are highly expressed in NPMc<sup>+</sup> MEF cells.

**Figure S4.** Knockdown of HOXA9 and PBX3 in NPM1 WT or NPMc<sup>+</sup> leukemic cell lines.

**Figure S5.** The anti-H3K79 methylation agent EPZ5676 inhibits the HOXA9/PBX3 axis and promotes apoptosis of NPMc<sup>+</sup> leukemia cells.

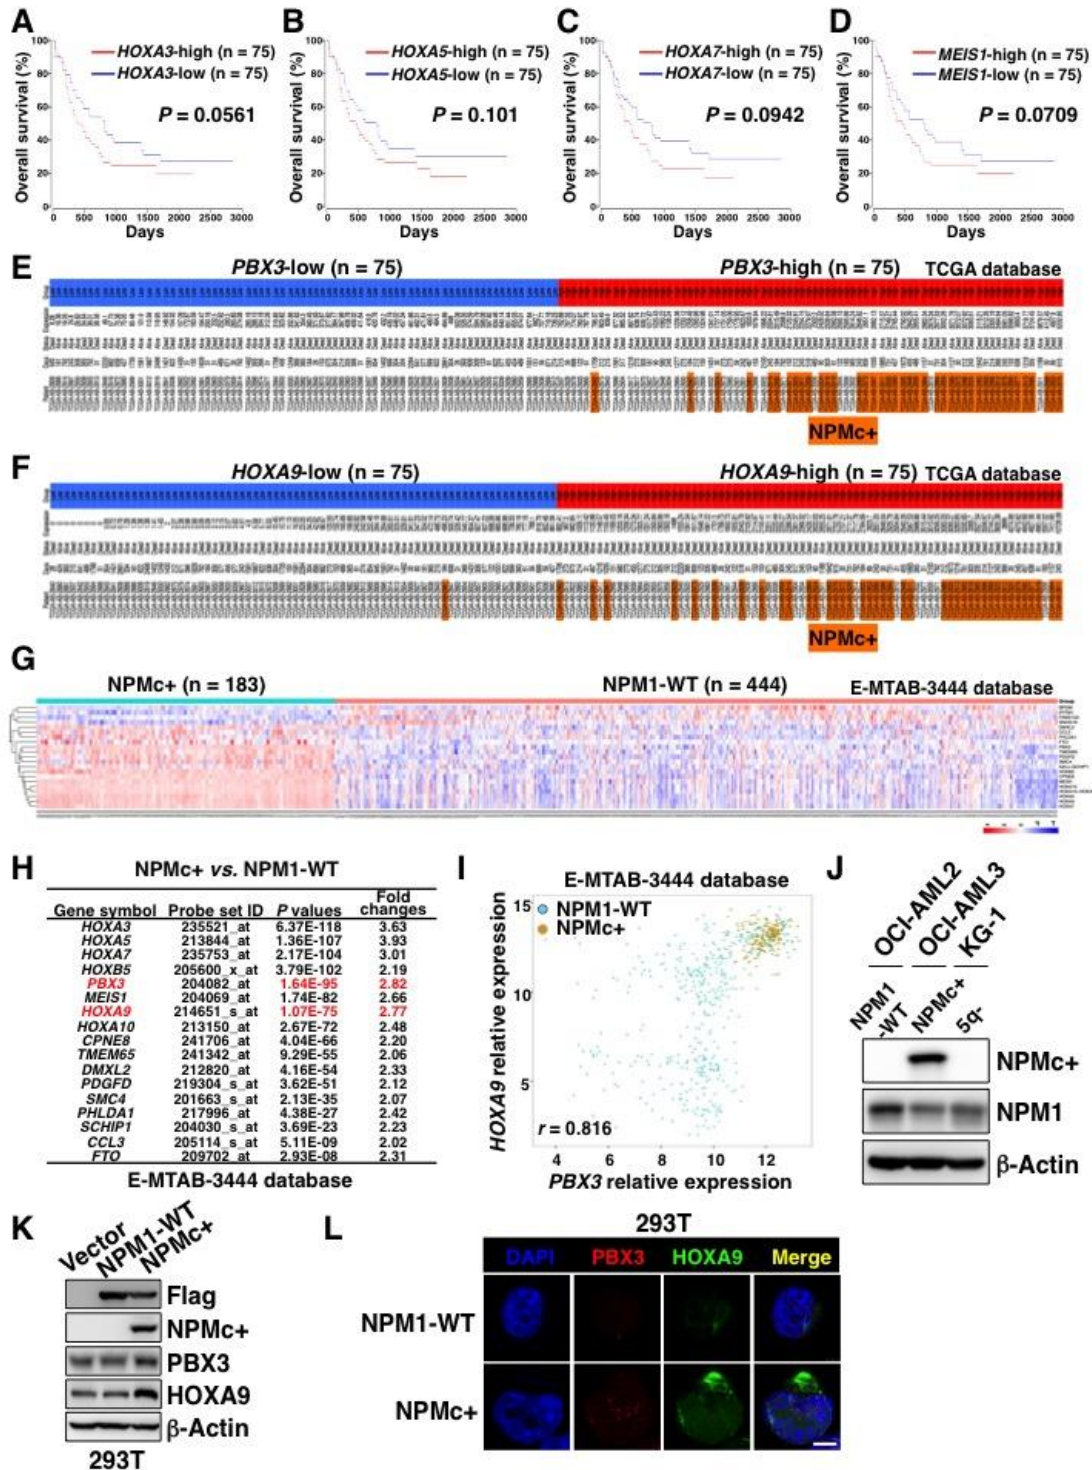

**Figure S1. NPMc+ AML patients have high PBX3 and HOXA9 expression.**  
 (A-D) The overall survival curves of AML patients with high (n=75) or low (n=75) transcription levels of *HOXA3* (A), *HOXA5* (B), *HOXA7* (C) and *MEIS1* (D). The follow-up AML patient survival data was obtained from the TCGA database. The *P* value was calculated using Kaplan-Meier analyses. (E-F) Detailed information of AML patients with high (n=75) or low (n=75) *PBX3* (E) and *HOXA9* (F) levels in the TCGA database (see also Figure 1A-B). The orange-filled boxes indicate the NPMc+ AML cells, which mostly harbor high *PBX3* and *HOXA9* gene expression. (G) A heat

map shows the mRNA levels of a cluster of genes expressed differentially ( $P < 0.01$ , fold change  $> 2$ ) between AML patients with NPMc+ (n=183) and AML patients with WT NPM1 (n=444) from the E-MTAB-3444 database. These top 17 differentiated genes were listed for their significant differentiation between two groups. The selection criterion was based on their  $P$  values. The z-score bar measures the color expression intensity. **(H)** Detailed information on the differentiated genes listed in Figure S1G. The red annotations indicate relative transcription levels of *PBX3* and *HOXA9*. **(I)** A Pearson correlation analysis on the relative mRNA levels of *PBX3* and *HOXA9* in WT NPM1 or NPMc+ samples obtained from the E-MTAB-3444 dataset. **(J)** NPMc+ and NPM1 protein expression in OCI-AML2, OCI-AML3 and KG-1 cells. These cell lines carry WT NPM1, NPMc+ and NPM1 haploinsufficiency (5q-), respectively. Three independent western blotting replicates were performed. **(K)** Flag-tagged NPM1, NPMc+, *PBX3* and *HOXA9* protein expression in 293T cells stably transfected with the Flag-tagged vector, WT NPM1 or NPMc+. The measurement of protein level was from three independent western blotting replicates. **(L)** Representative immunofluorescence staining of *PBX3* and *HOXA9* in 293T cells transfected with lentivirus carrying WT NPM1 or NPMc+. Images were representative from three independent experiments of at least six random fields.

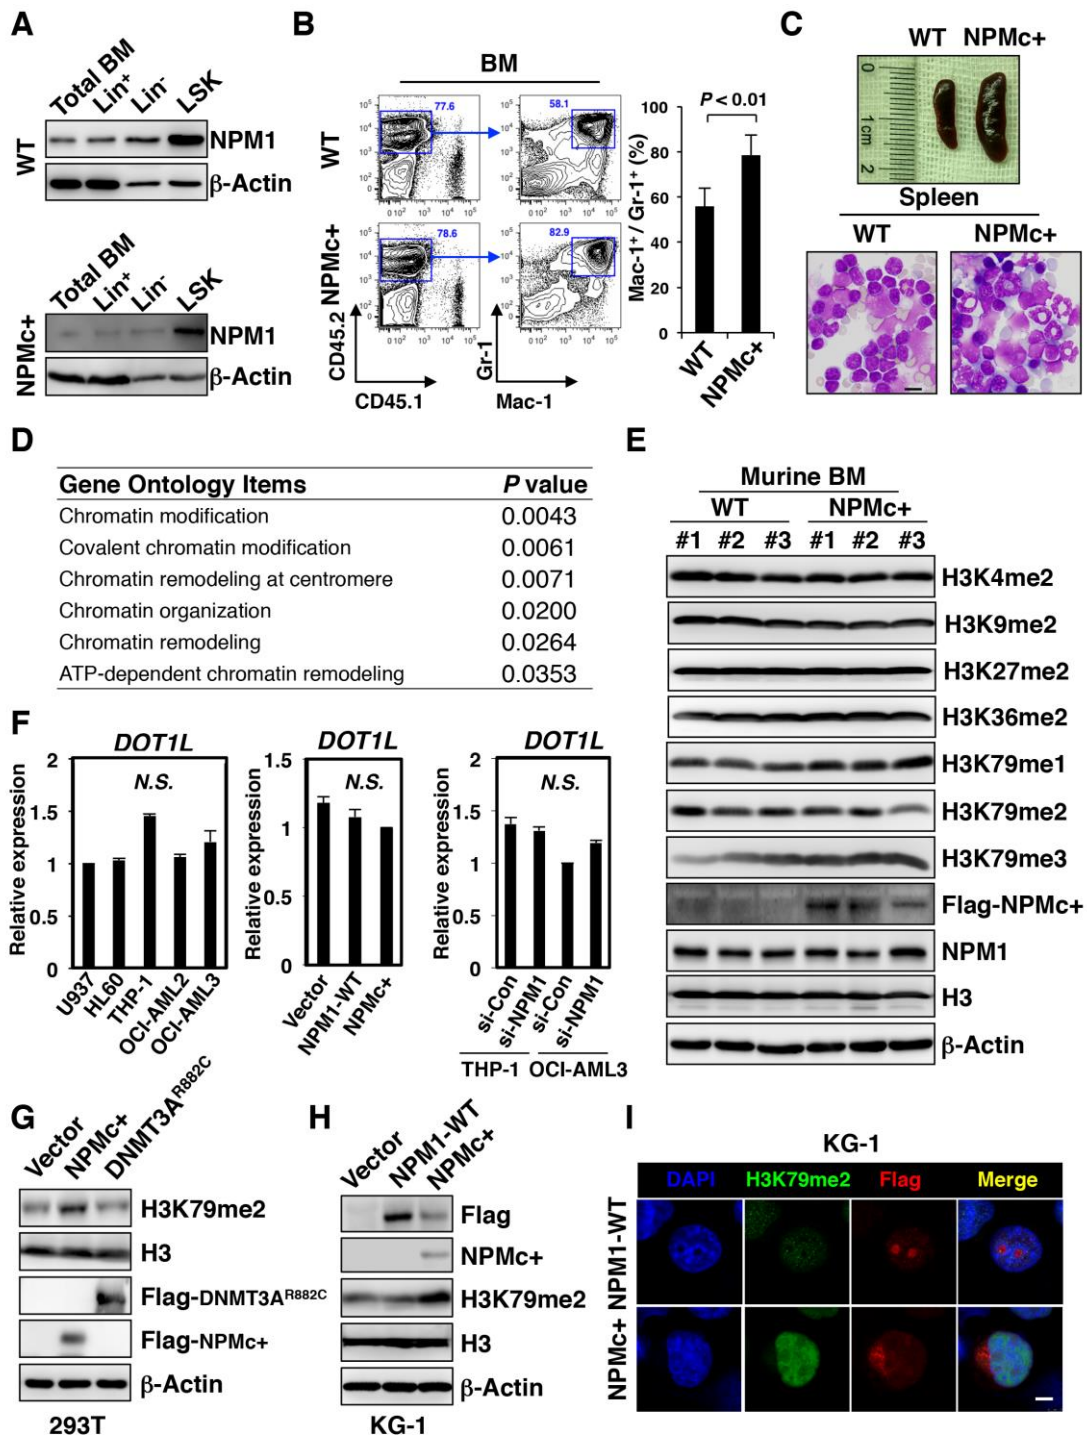

**Figure S2. NPMc+ drives myeloproliferation in murine hematopoietic progenitors and aberrant H3K79 modification in hematopoietic cells.**

(A) NPM1 protein expression in different compartments of bone marrow (BM) cells sorted from WT (upper) or NPMc+ transgenic (bottom) mice, as detected by western blot. Lin: cell population labeled by the Lineage antibody; LSK: Lin-Sca-1<sup>+</sup>c-Kit<sup>+</sup> group. Three independent western blotting replicates were performed. (B) CD45.2<sup>+</sup> WT or NPMc+ murine BM LSKs were purified and transplanted into lethally irradiated CD45.1<sup>+</sup> WT mice. Representative scatter plots show the percentage of

myeloid populations (Mac-1<sup>+</sup>/Gr-1<sup>+</sup>) in the murine BM cells collected 12 weeks after transplantation with CD45.2<sup>+</sup> WT or NPMc<sup>+</sup> LSKs. Column diagram showing the percentage of myeloid populations (Mac-1<sup>+</sup>/Gr-1<sup>+</sup>) in the murine BM cells collected 12 weeks after transplantation with CD45.2<sup>+</sup> WT or NPMc<sup>+</sup> LSKs. The values are presented as the mean  $\pm$  SEM (n=6 per group). Data are representative of two independent transplant experiments. **(C)** A comparison of the size of the spleens in the WT and NPMc<sup>+</sup> mice 12 weeks after transplantation (upper). Wright's staining of the splenic cells in the WT and NPMc<sup>+</sup> mice 12 weeks post-transplantation (bottom). Data are representative of six WT and NPMc<sup>+</sup> mice, respectively. The scale bar represents 10  $\mu$ m. **(D)** A gene ontology (GO) analysis of the differentially expressed genes in NPMc<sup>+</sup> murine BM LSKs revealed that a series of functional genes involved in chromatin modification is up- or down-regulated. **(E)** Expression levels of methylated H3K4, H3K9, H3K27, H3K36, H3K79, mutated NPM1 and total NPM1 in BMs from WT or NPMc<sup>+</sup> transgenic mice. **(F)** Real-time PCR detection of *DOTIL* in U937, HL-60, THP-1, OCI-AML2 and OCI-AML3 human leukemia cell lines. OCI-AML3 cells bear NPMc<sup>+</sup> (left panel). *DOTIL* mRNA expression in 293T cells overexpressing the Flag-tagged control vector, WT NPM1 or NPMc<sup>+</sup> (middle panel). *DOTIL* mRNA levels in THP-1 and OCI-AML3 cells with or without NPM1 knocked down (right panel). NC: scramble siRNA. siNPM1: siRNA targeting *NPM1* mRNA. Three independent assays were performed in each group. The data are expressed as the mean  $\pm$  SEM. **(G)** Western blot detection of methylated H3K79 in 293T cells overexpressing NPMc<sup>+</sup> or the DNMT3A R882C mutant. The measurement of protein level was from three independent western blotting replicates. **(H)** KG-1 cells were stably transfected with a Flag-tagged vector, WT NPM1 or NPMc<sup>+</sup>. Western blot data showed the expression levels of Flag-tagged NPM1, NPMc<sup>+</sup> and H3K79me<sub>2</sub> in the transfected cells. Three independent western blotting replicates were performed. **(I)** Representative immunofluorescence staining of H3K79me<sub>2</sub> and Flag-tagged NPM1 in KG-1 cells transfected with lentivirus carrying WT NPM1 or NPMc<sup>+</sup>. Images were representative from three independent experiments of at least six random fields.

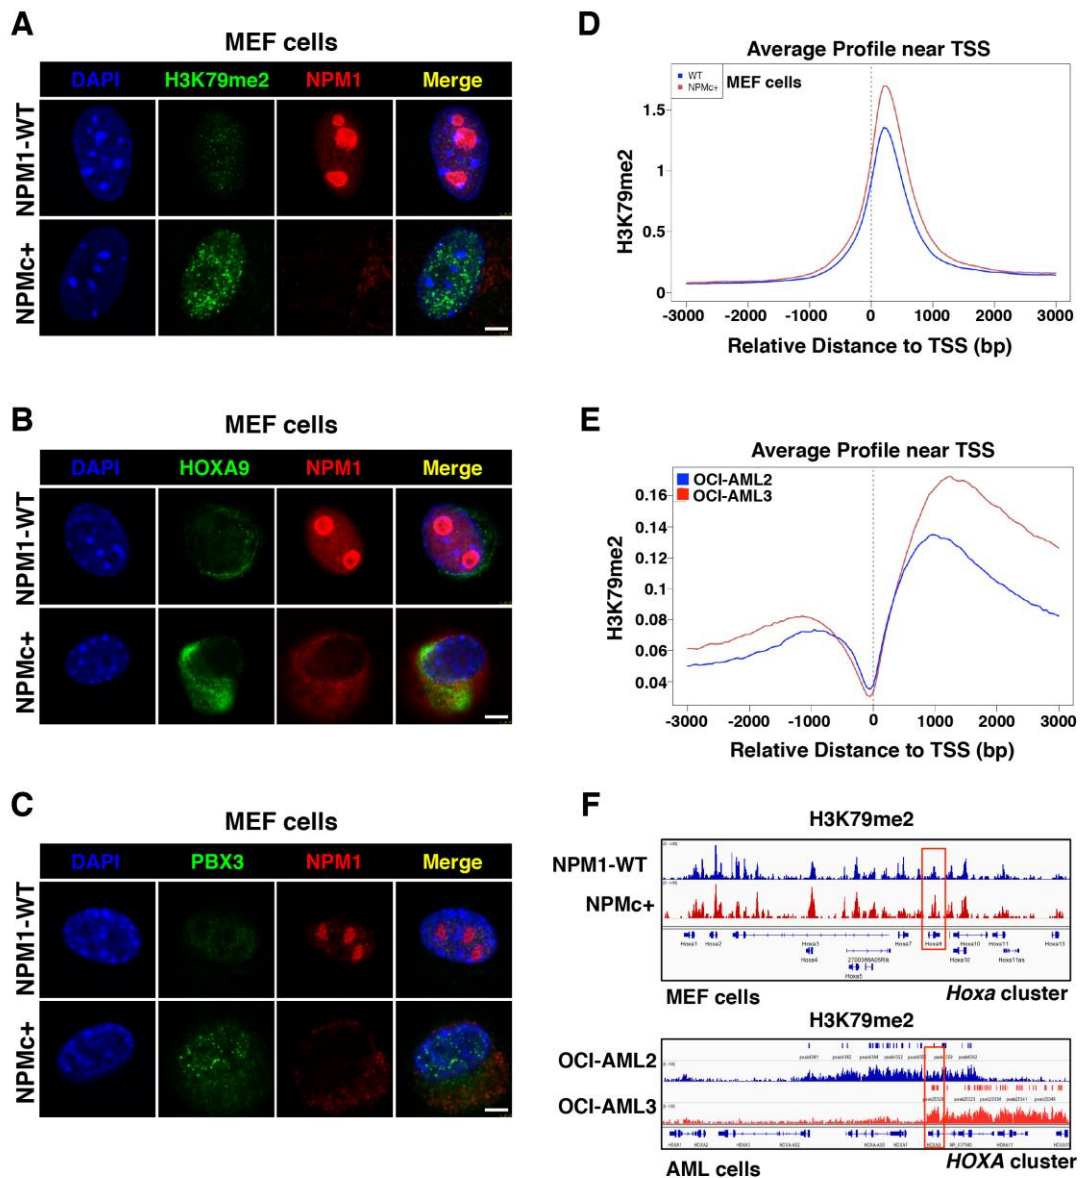

**Figure S3. H3K79me2, HOXA9 and PBX3 are highly expressed in NPMc+ MEF cells.**

(A-C) Representative immunofluorescence staining of H3K79me2 (A), HOXA9 (B) or PBX3 (C) in MEF cells carrying WT NPM1 or NPMc+. Cells with WT NPM1 or NPMc+ were co-stained with an NPM1 antibody. The scale bar represents 5 μm. Images were representative from three independent experiments of at least six random fields. (D-F) Average profiles showing ChIP-seq signal of H3K79me2 at TSSs ± 3 kb regions for all genes in MEF cells (D) or AML cells (E). *HOXA* cluster genes are ranked according to the ChIP-seq signal of H3K79me2 in MEF cells or AML cells (F).

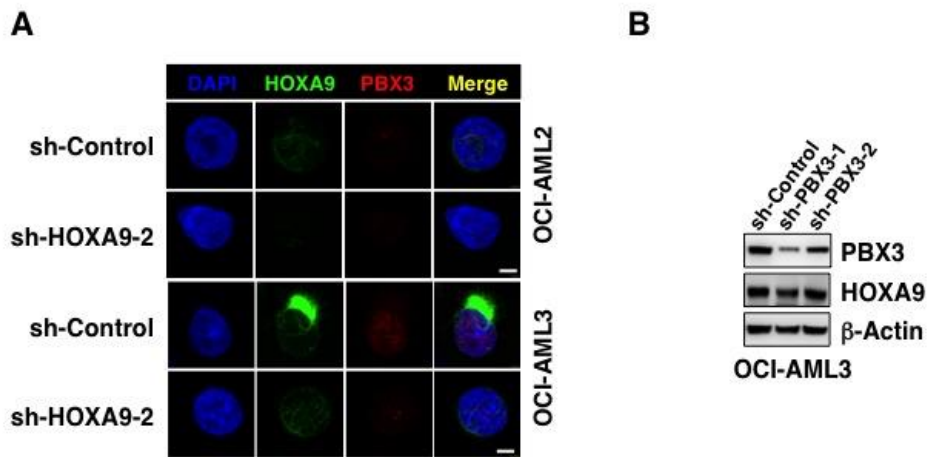

**Figure S4. Knockdown of HOXA9 and PBX3 in NPM1 WT or NPMc+ leukemic cell lines.**

(A) Representative immunofluorescence staining of HOXA9 and PBX3 in the OCI-AML2 or OCI-AML3 cells transduced with control shRNA (shControl) or shRNA targeting HOXA9 mRNA (sh-HOXA9-2). The scale bar represents 5  $\mu$ m. Images were representative from three independent experiments of at least six random fields. (B) Western blot assays of the PBX3 and HOXA9 levels in OCI-AML3 cells exposed to one control shRNA (shControl) or two different shRNAs targeting PBX3 (sh-PBX3-1, sh-PBX3-2) delivered by lentiviral vectors. The measurement of protein level was from three independent western blotting replicates.

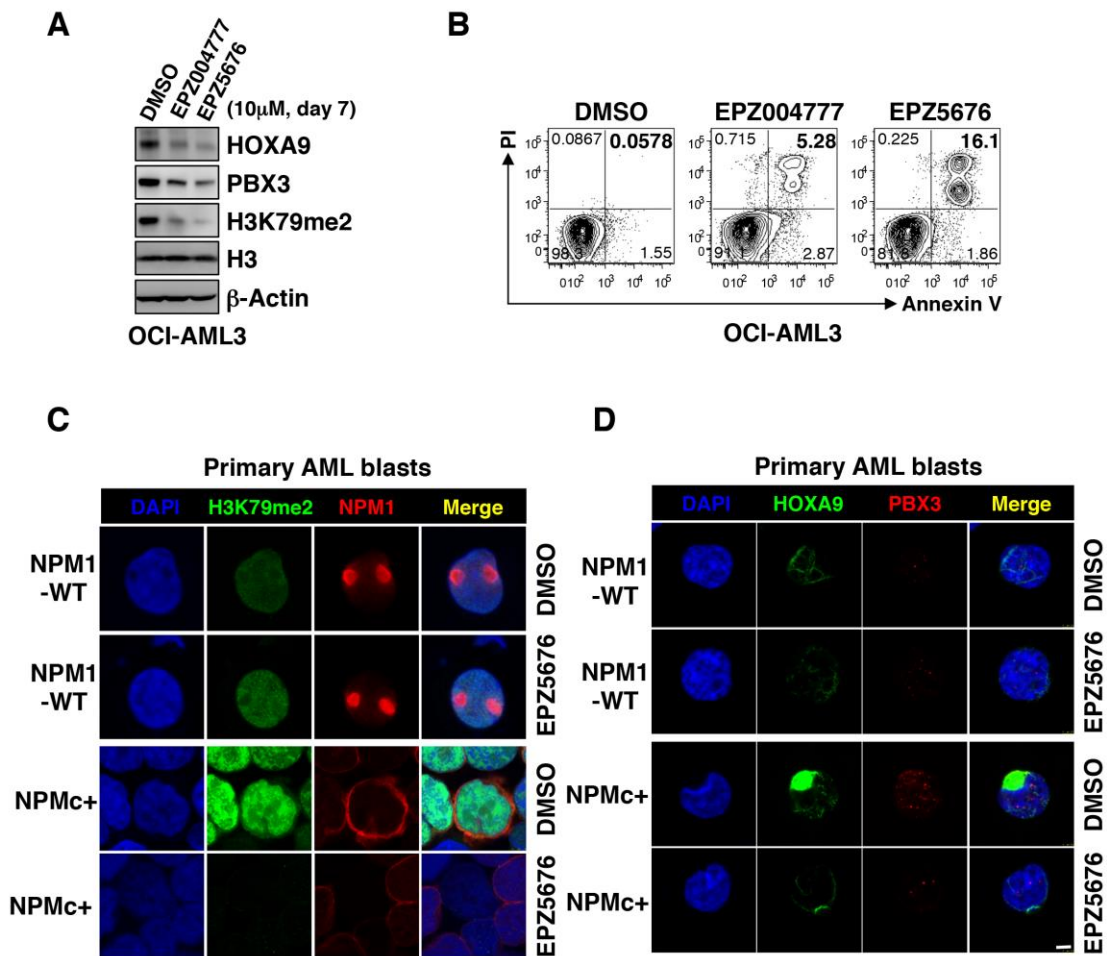

**Figure S5. The anti-H3K79 methylation agent EPZ5676 inhibits the HOXA9/PBX3 axis and promotes apoptosis of NPMc+ leukemia cells.**

(A) OCI-AML3 cells were treated with EPZ004777 (10 μM) or EPZ5676 (10 μM) for 7 days, and HOXA9, PBX3 and H3K79me2 expression was measured by western blot. Three independent western blotting replicates were performed. (B) Representative scatter plots of apoptotic OCI-AML3 cells (Annexin V+) treated with EPZ004777 (10 μM) or EPZ5676 (10 μM) for 7 days. Three independent flow cytometric assays were performed for each group. (C) Representative immunofluorescence staining of H3K79me2 in the AML patients' blasts treated with DMSO or EPZ5676 (10 μM) for 48 h *in vitro*. Blasts with WT NPM1 or NPMc+ were co-stained with an NPM1 antibody. Scale bar represents 5 μm. The measurement of protein level was from three independent western blotting replicates. (D) Representative immunofluorescence staining of HOXA9 and PBX3 in the AML patients' blasts (WT NPM1 or NPMc+) treated with DMSO or EPZ5676 (10 μM) for 48 h *in vitro*. The measurement of protein level was from three independent western blotting replicates.
